# Supplementary material for: Assessing Oncologists’ Adoption of Biomarker Testing in Metastatic Colorectal Cancer Using Real-World Data
Source: PubMed Central journal article supplement — JNCI Cancer Spectr. 2022 Sep 23;6(6):pkac065. doi: 10.1093/jncics/pkac065 (PMC9664970; doi:10.1093/jncics/pkac065), 2022-09-23

Supplementary Figure 1. Multivariable logistic regression to predict testing of *KRAS*, *NRAS* or *BRAF*

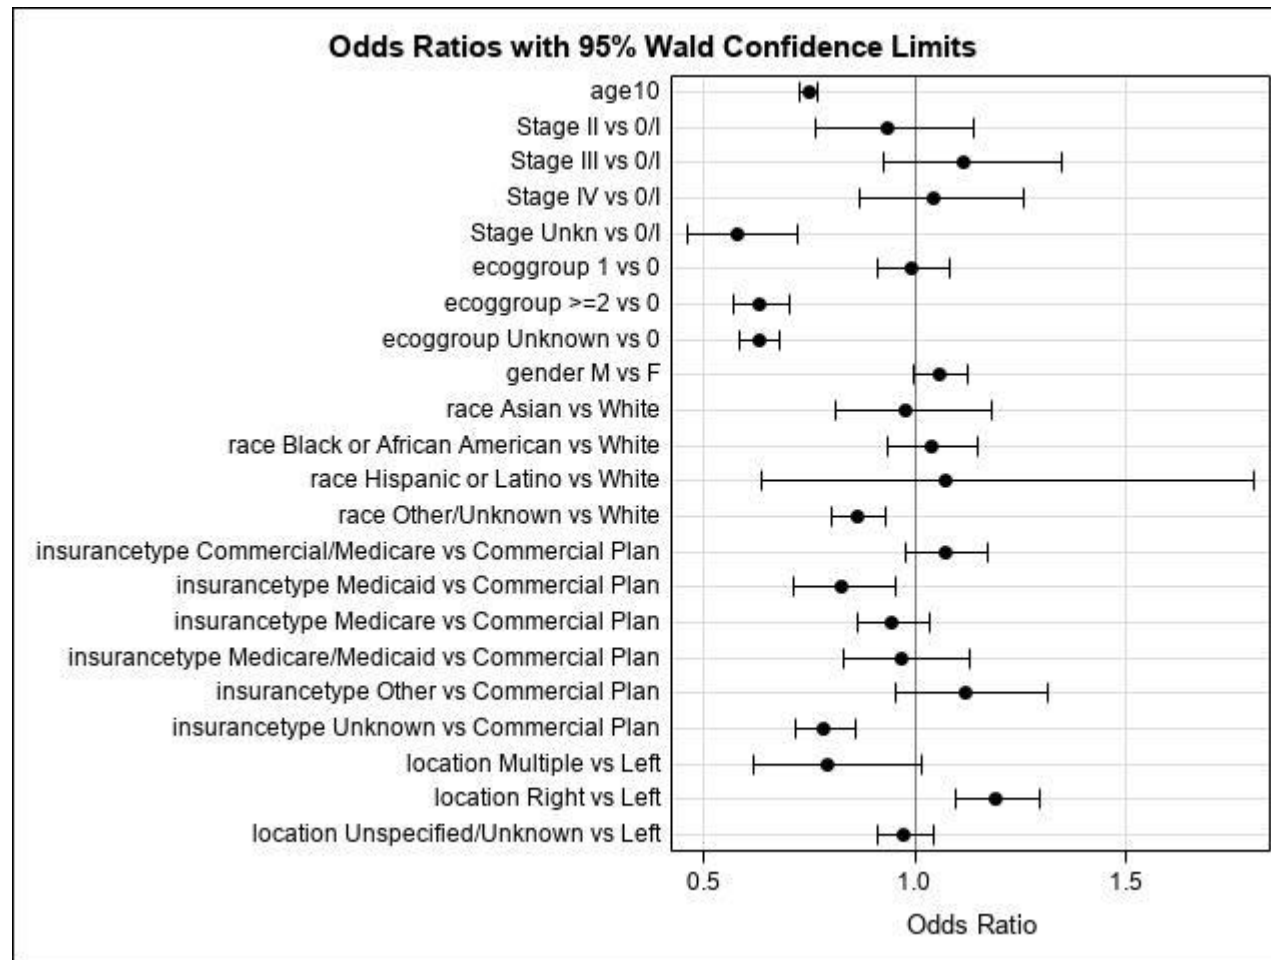

Supplementary Figure 2. Multivariable logistic regression to predict testing of *KRAS*, *NRAS* or *BRAF* with age and ECOG PS interaction

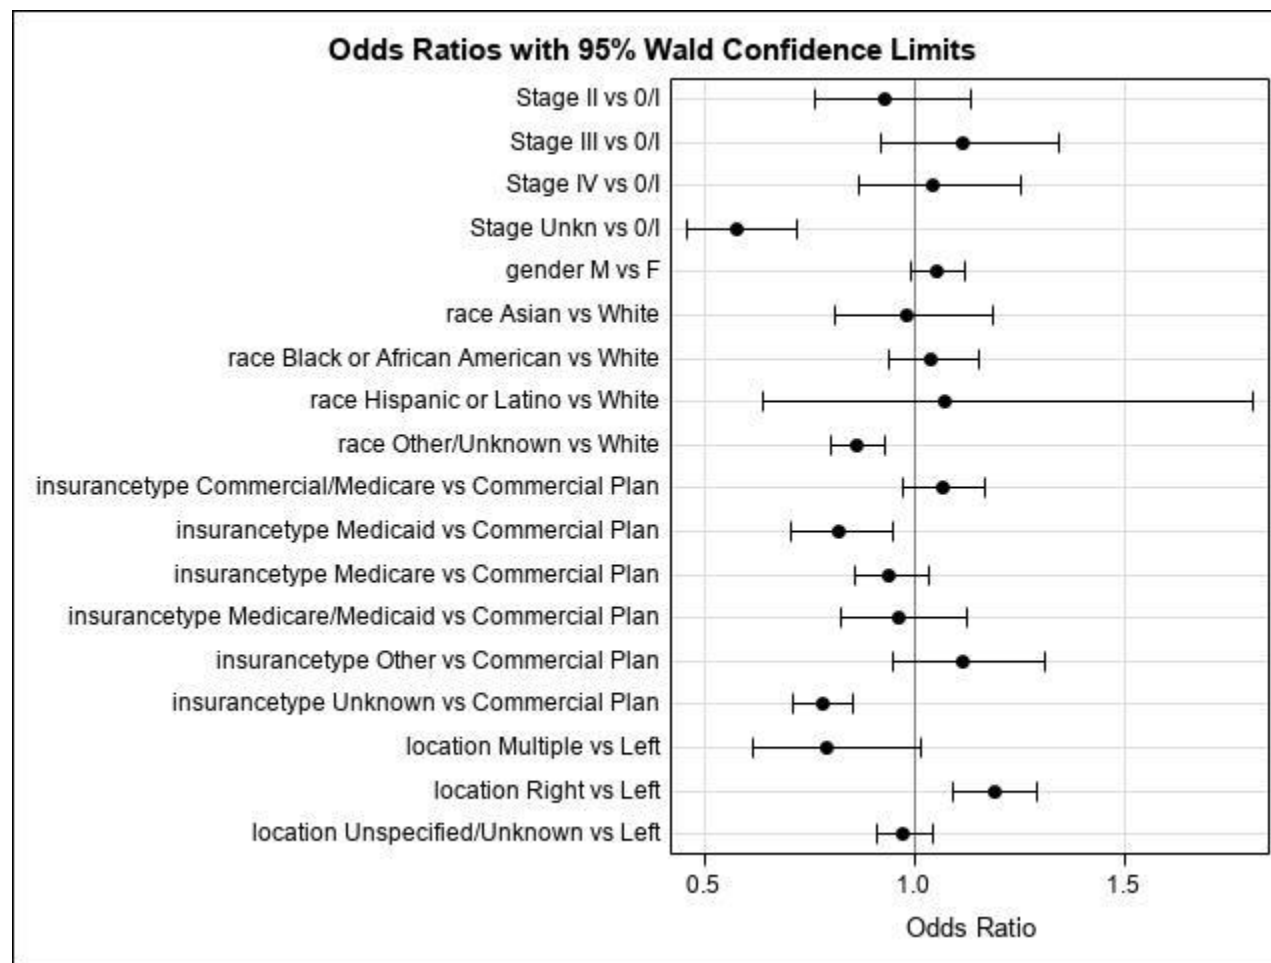

Supplementary Figure 3. Multivariable logistic regression to predict MSI testing

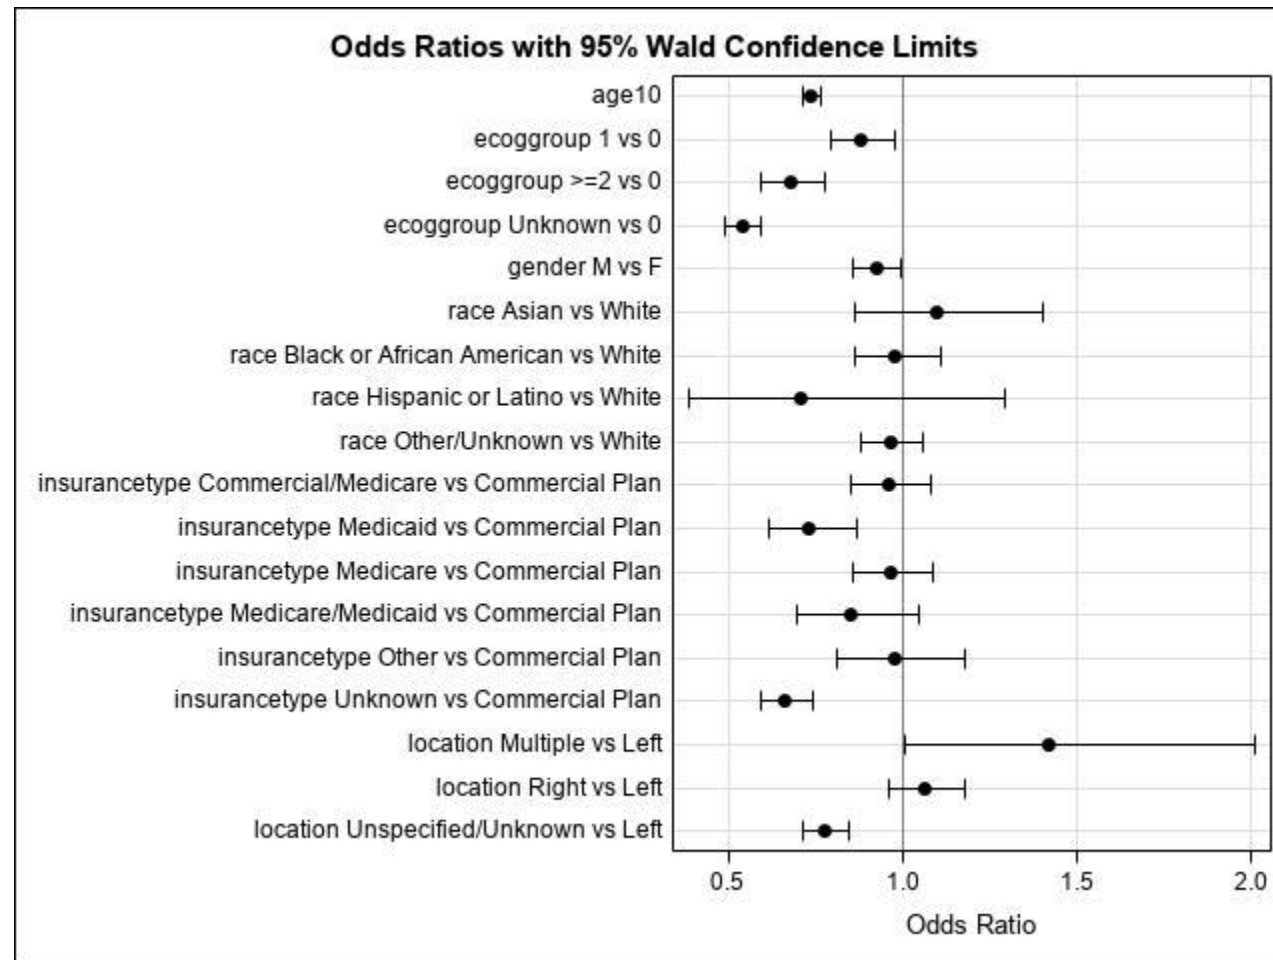

Supplementary Figure 4. Multivariable logistic regression to predict MSI testing with age and ECOG PS interaction

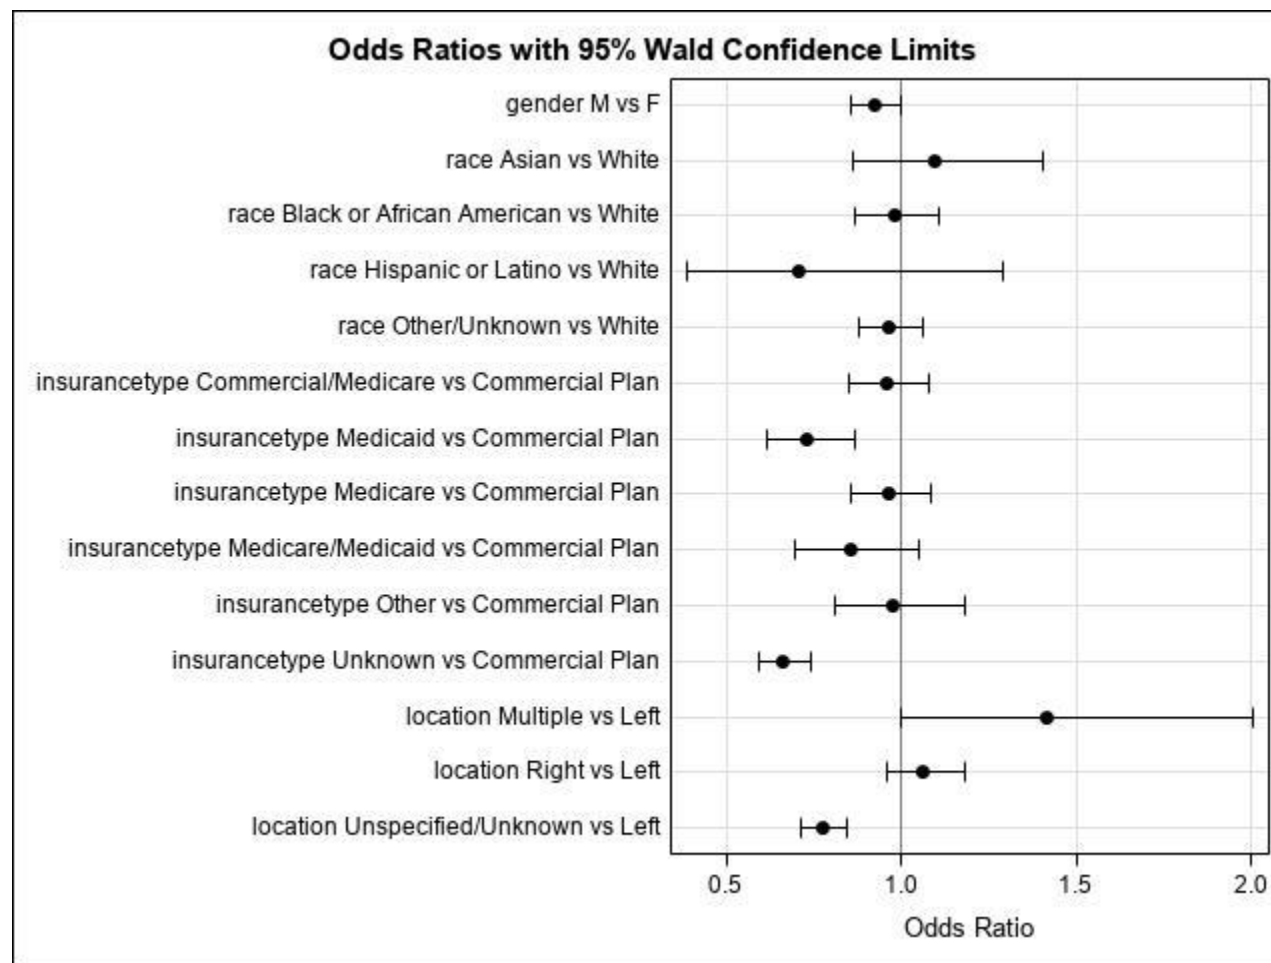

Supplement: pkac065_supplementary_data.pdf [file pkac065_supplementary_data.pdf]
